# Supplementary material
Source: PubMed Central journal article supplement (PMC9543173)
Supplement: CNE-530-2254-s001.pdf [file CNE-530-2254-s001.pdf]

Supporting Information 2 in Hahn et al., J. Comp. Neurol. 2022.

*Hide this title page (layer) to view the flatmap diagrams.*

**This is a layered Portable Document Format (PDF) file. Viewing in Adobe Acrobat software is required for layer functionality** (*layers may not be viewable with mobile versions of Acrobat, or if the PDF is opened inside a web browser*). To show or hide layers click on the boxes to the left of the layer names in the layer navigation pane. To show or hide the layer navigation pane, either click on the 3-stacked layers icon, or access it from the menu bar [View > Show/Hide > Navigation Panes > Layers].
